# Supplementary material for: TNF-α Plus IL-1β Induces Opposite Regulation of Cx43 Hemichannels and Gap Junctions in Mesangial Cells through a RhoA/ROCK-Dependent Pathway
Source: MDPI journal article supplement (doi:10.3390/ijms231710097), 2022-09-03
Supplement: s1 [file s1]

SUPPLEMENTARY FIGURES:

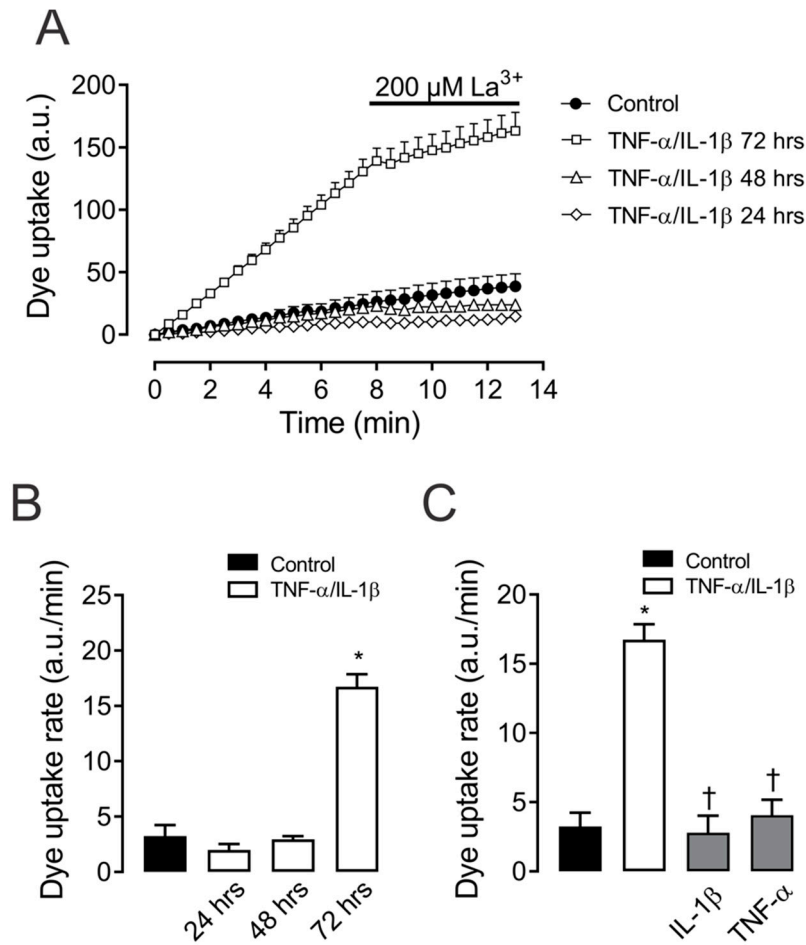

**Supplementary Figure S1. TNF- $\alpha$ /IL-1 $\beta$  increases the ethidium uptake in mesangial cells.** (A) Representative time-lapse recordings of 5  $\mu\text{M}$  ethidium ( $\text{Etd}^+$ ) uptake during 13 min in MES-13 cells under control conditions (black circles) or treated with TNF- $\alpha$ /IL-1 $\beta$  (10 ng/ml each) for different time periods (24-72 h). (B)  $\text{Etd}^+$  uptake rate of MES-13 cells under control conditions (black bar) or after treatment with TNF- $\alpha$ /IL-1 $\beta$  for different time periods (24-72 h, white bar). (C)  $\text{Etd}^+$  uptake rate of MES-13 cells under control conditions (black bar) or treated with TNF- $\alpha$ /IL-1 $\beta$  (white bar), TNF- $\alpha$  (10 ng/ml, dashed bar) or IL-1 $\beta$  (10 ng/ml, gray bar) for 72 h. In each experiment 15-25 cells were recorded. Each bar represents the mean value  $\pm$  SEM of five independent experiments with three replicates each. For statistical analysis, each treatment was compared with its corresponding control, and significance was determined using a one-way ANOVA followed, in case of significance, by a Tukey post-hoc test. Statistical significance \*  $p < 0.05$  vs. Ctrl; †  $p < 0.05$  vs. (TNF- $\alpha$ /IL-1 $\beta$ ) 72 h.

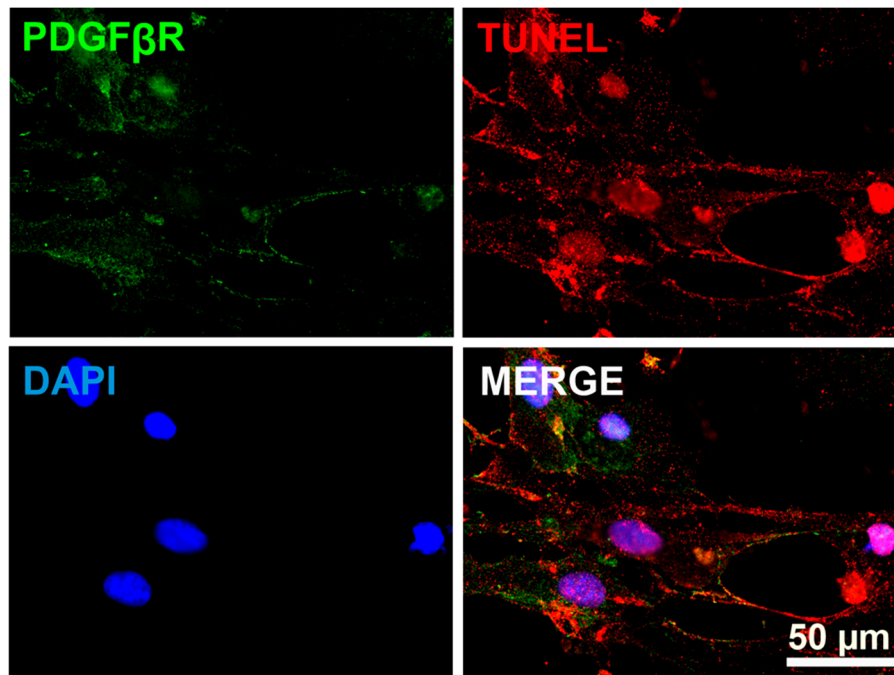

**Supplementary Figure S2. Positive control of TUNEL assay in primary mesangial cells.** Fluorescence images depicting PDGF $\beta$ R (green), TUNEL (red) and DAPI (blue) staining by primary MCs stimulated with DNase I (generates strand breaks in the DNA to provide a positive TUNEL reaction).
